# Supplementary material for: Characterization of Ex Vivo and In Vitro Wnt Transcriptome Induced by Spinal Cord Injury in Rat Microglial Cells
Source: MDPI journal article supplement (doi:10.3390/brainsci12060708), 2022-05-30
Supplement: s1 [file s1]

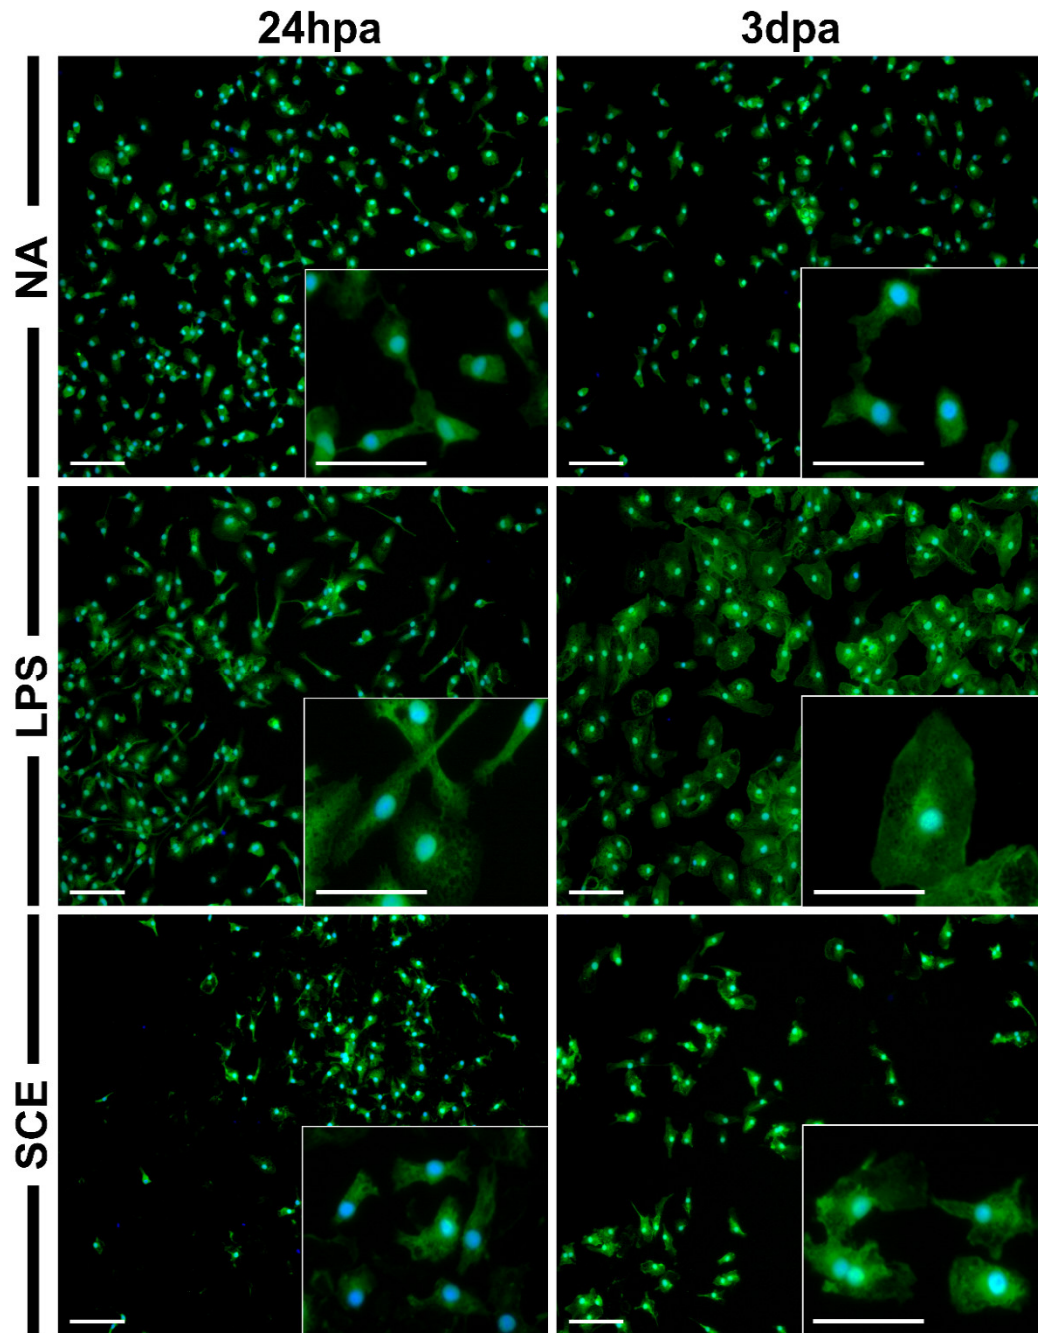

**Figure S1.** Microscopic analysis of microglia cell cultures. Representative images of non-activated (NA) microglial cells and after activation with 100 ng/mL of lipopolysaccharide (LPS) or with 200  $\mu$ g/mL of lesioned spinal cord extract (SCE) at 24 h post-activation (hpa) and 3 days post-activation (dpa). Scale bars in low magnification images represent 100  $\mu$ m, while scale bars in high magnification images represent 50  $\mu$ m.

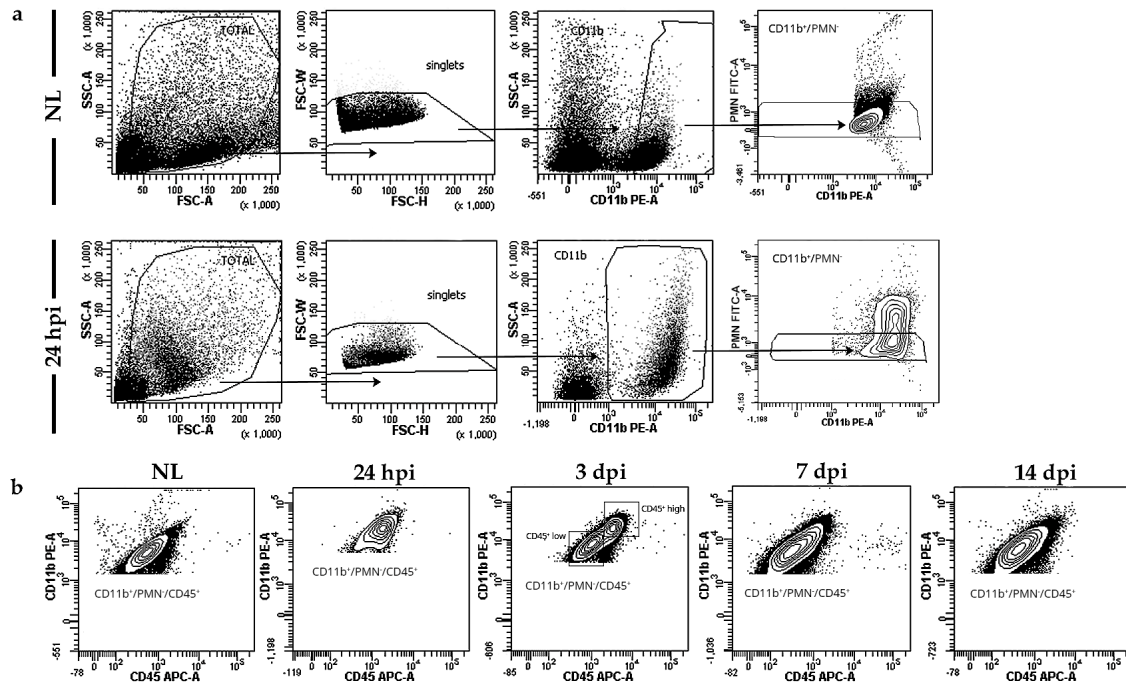

**Figure S2.** Gating strategy for rat microglia that were isolated by fluorescent-activated cell sorting (FACS). **(a)** Representative plots of non-lesioned (NL) and 24 h post-injured spinal cord (hpi) showing how microglia and macrophages were gated ( $CD11b^+/PMN^-$ ). **(b)** Representative setting from  $CD45$  sorting, showing how  $CD45^+$  low and high subpopulations of microglia were tried to be gated. The only point of the time course where we were able to discriminate low and high  $CD45^+$  subpopulations over the  $CD11b^+/PMN^-$  cells was 3 days post-injury (dpi).
